# Supplementary material
Source: PubMed Central journal article supplement (PMC4338547)
Supplement: NIHMS61060-supplement-2.pdf [file NIHMS61060-supplement-2.pdf]

**Supplementary Table 1**

Full genotypes and numbers of samples shown in main figure panels.

| Figure     | Panel                           | Genotype                                                                                                                                                                              | n = <sup>a</sup>                                                                                         |
|------------|---------------------------------|---------------------------------------------------------------------------------------------------------------------------------------------------------------------------------------|----------------------------------------------------------------------------------------------------------|
| Fig. 1     | c                               | <i>esg</i> <sup>MH766</sup> - <i>Gal4/CyO</i> or <i>Pin</i> <sup>YT</sup> ; <i>UAS-cd8GFP/UAS-cd8GFP</i>                                                                              | 15                                                                                                       |
|            | d                               | <i>esg</i> <sup>MH766</sup> - <i>Gal4/CyO</i> or <i>Pin</i> <sup>YT</sup> ; <i>UAS-cd8GFP/UAS-cd8GFP</i>                                                                              | 19                                                                                                       |
|            | e                               | <i>esg</i> <sup>MH766</sup> - <i>Gal4/CyO</i> or <i>Pin</i> <sup>YT</sup> ; <i>UAS-cd8GFP/UAS-cd8GFP</i>                                                                              | 9                                                                                                        |
|            | f                               | <i>esg</i> <sup>MH766</sup> - <i>Gal4/CyO</i> or <i>Pin</i> <sup>YT</sup> ; <i>UAS-cd8GFP/UAS-cd8GFP</i>                                                                              | 20                                                                                                       |
|            | g-k                             | <i>esg</i> <sup>MH766</sup> - <i>Gal4/CyO</i> or <i>Pin</i> <sup>YT</sup> ; <i>UAS-cd8GFP/UAS-cd8GFP</i>                                                                              | 11                                                                                                       |
| Fig. 2     | a                               | <i>esg</i> <sup>MH766</sup> - <i>Gal4/CyO</i> or <i>Pin</i> <sup>YT</sup> ; <i>UAS-cd8GFP/UAS-cd8GFP</i>                                                                              | 11                                                                                                       |
|            | b                               | <i>esg</i> <sup>MH766</sup> - <i>Gal4/CyO</i> or <i>Pin</i> <sup>YT</sup> ; <i>UAS-cd8GFP/UAS-cd8GFP</i>                                                                              | 19                                                                                                       |
|            | c, e                            | <i>esg</i> <sup>MH766</sup> - <i>Gal4/CyO</i> or <i>Pin</i> <sup>YT</sup> ; <i>UAS-cd8GFP/UAS-cd8GFP</i>                                                                              | 14                                                                                                       |
|            | d                               | <i>esg</i> <sup>MH766</sup> - <i>Gal4/CyO</i> or <i>Pin</i> <sup>YT</sup> ; <i>UAS-cd8GFP/UAS-cd8GFP</i>                                                                              | 8                                                                                                        |
|            | f                               | <i>esg</i> <sup>MH766</sup> - <i>Gal4/CyO</i> or <i>Pin</i> <sup>YT</sup> ; <i>UAS-cd8GFP/UAS-cd8GFP</i>                                                                              | 13                                                                                                       |
|            | g                               | <i>esg</i> <sup>MH766</sup> - <i>Gal4/CyO</i> or <i>Pin</i> <sup>YT</sup> ; <i>UAS-cd8GFP/UAS-cd8GFP</i>                                                                              | 7                                                                                                        |
|            | h                               | <i>w hs-FLP</i> <sup>122</sup> <i>elav-Gal4</i> <sup>c155</sup> <i>UAS-cd8GFP/+</i> or <i>Y; FRT42D tubP-Gal80/FRT42D; tubP-Gal4/+</i>                                                | 16                                                                                                       |
|            | i                               | <i>ey</i> <sup>3.5</sup> - <i>Gal80/w</i> <sup>1118</sup> or <i>Y; esg</i> <sup>MH766</sup> - <i>Gal4/+</i> ; <i>UAS-Dcr2 UAS-cd8GFP/+</i>                                            | 4                                                                                                        |
|            | j                               | <i>w hs-FLP</i> <sup>122</sup> <i>elav-Gal4</i> <sup>c155</sup> <i>UAS-cd8GFP/+</i> or <i>Y; FRT42D tubP-Gal80/FRT42D Pcl</i> <sup>3-78*38</sup> ; <i>tubP-Gal4/+</i>                 | 5/8                                                                                                      |
|            | Fig. 3                          | a                                                                                                                                                                                     | <i>esg</i> <sup>MH766</sup> - <i>Gal4/CyO</i> or <i>Pin</i> <sup>YT</sup> ; <i>UAS-cd8GFP/UAS-cd8GFP</i> |
| b          |                                 | <i>ey</i> <sup>3.5</sup> - <i>Gal80/w</i> <sup>1118</sup> or <i>Y; fas3</i> <sup>NP1233</sup> - <i>Gal4/+</i> ; <i>UAS-Dcr2 UAS-cd8GFP/+</i>                                          | 4                                                                                                        |
| c          |                                 | <i>ey</i> <sup>3.5</sup> - <i>Gal80/+</i> or <i>Y; fas3</i> <sup>NP1233</sup> - <i>Gal4/dpp-lacZ</i> <sup>Exel.2</sup> ; <i>UAS-Dcr2 UAS-cd8GFP/UAS-esg</i> <sup>IR GD9794</sup>      | 16/30                                                                                                    |
| e          |                                 | <i>esg</i> <sup>MH766</sup> - <i>Gal4/CyO</i> or <i>Pin</i> <sup>YT</sup> ; <i>UAS-cd8GFP/UAS-cd8GFP</i>                                                                              | 5                                                                                                        |
| f          |                                 | <i>esg</i> <sup>MH766</sup> - <i>Gal4/CyO</i> or <i>Pin</i> <sup>YT</sup> ; <i>UAS-cd8GFP/UAS-cd8GFP</i>                                                                              | 12                                                                                                       |
| i          |                                 | <i>w</i> <sup>1118</sup>                                                                                                                                                              | 4                                                                                                        |
| j          |                                 | <i>w</i> <sup>1118</sup>                                                                                                                                                              | 8                                                                                                        |
| k          |                                 | <i>w</i> <sup>1118</sup>                                                                                                                                                              | 7                                                                                                        |
| l          |                                 | <i>w</i> <sup>1118</sup>                                                                                                                                                              | 9                                                                                                        |
| Fig. 4     |                                 | a-c                                                                                                                                                                                   | <i>+/CyO</i> or <i>Pin</i> <sup>YT</sup> ; <i>dpp-Gal4/UAS-cd8GFP</i>                                    |
|            | d                               | <i>brk</i> <sup>x47</sup> / <i>+</i> or <i>Y; UAS-cd8GFP/+</i> ; <i>dpp-Gal4/+</i>                                                                                                    | 4                                                                                                        |
|            | e                               | <i>omb</i> <sup>P1</sup> / <i>+</i> or <i>Y; UAS-cd8GFP/+</i> ; <i>dpp-Gal4/+</i>                                                                                                     | 3                                                                                                        |
|            | g (wt)                          | <i>ey</i> <sup>3.5</sup> - <i>Gal80/+</i> or <i>Y; ubi-GFP cycE</i> <sup>AR95</sup> <i>FRT40A/FRT40A; lama-Gal4 UAS-FLP mδ/dpp-lacZ</i> <sup>Exel.2</sup>                             | 13                                                                                                       |
|            | ( <i>tkv</i> <sup>strll</sup> ) | <i>ey</i> <sup>3.5</sup> - <i>Gal80/+</i> or <i>Y; ubi-GFP cycE</i> <sup>AR95</sup> <i>FRT40A/tkv</i> <sup>strll</sup> <i>FRT40A; lama-Gal4 UAS-FLP mδ/dpp-lacZ</i> <sup>Exel.2</sup> | 29/33                                                                                                    |
|            | h (wt)                          | <i>ey</i> <sup>3.5</sup> - <i>Gal80/brk</i> <sup>x47</sup> ; <i>ubi-GFP cycE</i> <sup>AR95</sup> <i>FRT40A/FRT40A; lama-Gal4 UAS-FLP mδ/TM2</i>                                       | 3                                                                                                        |
|            | ( <i>tkv</i> <sup>strll</sup> ) | <i>ey</i> <sup>3.5</sup> - <i>Gal80/brk</i> <sup>x47</sup> ; <i>ubi-GFP cycE</i> <sup>AR95</sup> <i>FRT40A/tkv</i> <sup>strll</sup> <i>FRT40A; lama-Gal4 UAS-FLP mδ/TM2</i>           | 18                                                                                                       |
|            | i (wt)                          | <i>ey</i> <sup>3.5</sup> - <i>Gal80/omb</i> <sup>P1</sup> ; <i>ubi-GFP cycE</i> <sup>AR95</sup> <i>FRT40A/FRT40A; lama-Gal4 UAS-FLP mδ/TM2</i>                                        | 8                                                                                                        |
|            | ( <i>tkv</i> <sup>strll</sup> ) | <i>ey</i> <sup>3.5</sup> - <i>Gal80/omb</i> <sup>P1</sup> ; <i>ubi-GFP cycE</i> <sup>AR95</sup> <i>FRT40A/tkv</i> <sup>strll</sup> <i>FRT40A; lama-Gal4 UAS-FLP mδ/+</i>              | 40                                                                                                       |
|            | Fig. 5                          | a                                                                                                                                                                                     | <i>acj6-Gal4 UAS-cd8GFP/+</i> ; <i>UAS-cd8GFP/+</i>                                                      |
| b          |                                 | <i>esg</i> <sup>MH766</sup> - <i>Gal4/CyO</i> or <i>Pin</i> <sup>YT</sup> ; <i>UAS-cd8GFP/UAS-cd8GFP</i>                                                                              | 3                                                                                                        |
| c          |                                 | <i>w</i> <sup>1118</sup>                                                                                                                                                              | 9                                                                                                        |
| e, f, h, i |                                 | <i>w hs-FLP</i> <sup>122</sup> <i>elav-Gal4</i> <sup>c155</sup> <i>UAS-cd8GFP/+</i> or <i>Y; FRT42D tubP-Gal80/FRT42D; tubP-Gal4/+</i>                                                | 16                                                                                                       |
| g, j, k    |                                 | <i>w hs-FLP</i> <sup>122</sup> <i>elav-Gal4</i> <sup>c155</sup> <i>UAS-cd8GFP/+</i> or <i>Y; FRT42D tubP-Gal80/FRT42D</i>                                                             | 17                                                                                                       |
| Fig. 6     | a                               | <i>ey</i> <sup>3.5</sup> - <i>Gal80/w</i> <sup>1118</sup> or <i>Y; esg</i> <sup>MH766</sup> - <i>Gal4/+</i> ; <i>UAS-Dcr2 UAS-cd8GFP/+</i>                                            | 6                                                                                                        |

|        |   |                                                                                                                                                                            |    |
|--------|---|----------------------------------------------------------------------------------------------------------------------------------------------------------------------------|----|
|        | b | <i>w</i> <sup>1118</sup>                                                                                                                                                   | 7  |
|        | c | <i>w</i> <sup>1118</sup>                                                                                                                                                   | 17 |
|        | d | <i>w</i> <sup>1118</sup>                                                                                                                                                   | 10 |
|        | e | <i>w</i> <sup>1118</sup>                                                                                                                                                   | 11 |
|        | f | <i>w</i> <sup>1118</sup>                                                                                                                                                   | 6  |
|        | g | <i>w hs-FLP</i> <sup>122</sup> <i>elav-Gal4</i> <sup>c155</sup> <i>UAS-cd8GFP</i> +/ or Y; <i>FRT42D tubP-Gal80</i> / <i>FRT42D</i> ;<br><i>tubP-Gal4</i> +                | 2  |
|        | h | <i>w hs-FLP</i> <sup>122</sup> <i>elav-Gal4</i> <sup>c155</sup> <i>UAS-cd8GFP</i> +/ or Y; <i>FRT42D tubP-Gal80</i> / <i>FRT42D</i> ;<br><i>tubP-Gal4</i> +                | 6  |
|        | i | <i>brk</i> <sup>x47</sup> /+ or Y; <i>UAS-cd8GFP</i> +/; <i>dpp-Gal4</i> +                                                                                                 | 4  |
| Fig. 7 | a | <i>ey</i> <sup>3.5</sup> - <i>Gal80</i> /+ or Y; <i>fas3</i> <sup>NP1233</sup> - <i>Gal4</i> /+; <i>UAS-Dcr2 UAS-cd8GFP</i> / <i>UAS-I'sc</i> <sup>IR JF02399</sup>        | 10 |
|        | b | <i>ey</i> <sup>3.5</sup> - <i>Gal80</i> /+ or Y; <i>fas3</i> <sup>NP1233</sup> - <i>Gal4</i> /+; <i>UAS-Dcr2 UAS-cd8GFP</i> / <i>UAS-I'sc</i> <sup>IR JF02399</sup>        | 17 |
|        | c | <i>ey</i> <sup>3.5</sup> - <i>Gal80</i> /+ or Y; <i>fas3</i> <sup>NP1233</sup> - <i>Gal4</i> /+; <i>UAS-Dcr2 UAS-cd8GFP</i> / <i>UAS-I'sc</i> <sup>IR JF02399</sup>        | 7  |
|        | d | <i>ey</i> <sup>3.5</sup> - <i>Gal80</i> /+ or Y; <i>fas3</i> <sup>NP1233</sup> - <i>Gal4</i> /+; <i>UAS-Dcr2 UAS-cd8GFP</i> / <i>UAS-I'sc</i> <sup>IR JF02399</sup>        | 12 |
|        | e | <i>ey</i> <sup>3.5</sup> - <i>Gal80</i> /+ or Y; <i>fas3</i> <sup>NP1233</sup> - <i>Gal4</i> /+; <i>UAS-Dcr2 UAS-cd8GFP</i> / <i>UAS-I'sc</i> <sup>IR JF02399</sup>        | 6  |
|        | f | <i>ey</i> <sup>3.5</sup> - <i>Gal80</i> /+ or Y; <i>fas3</i> <sup>NP1233</sup> - <i>Gal4</i> /+; <i>UAS-Dcr2 UAS-cd8GFP</i> / <i>UAS-I'sc</i> <sup>IR JF02399</sup>        | 7  |
|        | g | <i>ey</i> <sup>3.5</sup> - <i>Gal80</i> /+ or Y; <i>fas3</i> <sup>NP1233</sup> - <i>Gal4</i> /+; <i>UAS-Dcr2 UAS-cd8GFP</i> / <i>UAS-I'sc</i> <sup>IR JF02399</sup>        | 9  |
|        | h | <i>ey</i> <sup>3.5</sup> - <i>Gal80</i> /+ or Y; <i>fas3</i> <sup>NP1233</sup> - <i>Gal4</i> /+; <i>UAS-Dcr2 UAS-cd8GFP</i> / <i>UAS-I'sc</i> <sup>IR JF02399</sup>        | 9  |
|        | j | <i>w</i> <sup>1118</sup>                                                                                                                                                   | 17 |
|        | k | <i>Df(1)ase-1, sc</i> <sup>ase-1</sup> <i>pn</i> <sup>1</sup> /Y                                                                                                           | 11 |
|        | l | <i>w</i> <sup>1118</sup>                                                                                                                                                   | 11 |
|        | m | <i>Df(1)ase-1, sc</i> <sup>ase-1</sup> <i>pn</i> <sup>1</sup> /Y                                                                                                           | 10 |
|        | n | <i>w</i> <sup>1118</sup>                                                                                                                                                   | 6  |
|        | o | <i>Df(1)ase-1, sc</i> <sup>ase-1</sup> <i>pn</i> <sup>1</sup> /Y                                                                                                           | 7  |
| Fig. 8 | a | <i>ey</i> <sup>3.5</sup> - <i>Gal80</i> / <i>w</i> <sup>1118</sup> or Y; <i>fas3</i> <sup>NP1233</sup> - <i>Gal4</i> /+; <i>UAS-Dcr2 UAS-cd8GFP</i> +                      | 4  |
|        | b | <i>ey</i> <sup>3.5</sup> - <i>Gal80</i> /+ or Y; <i>fas3</i> <sup>NP1233</sup> - <i>Gal4</i> / <i>UAS-D</i> <sup>IR KK107194</sup> ; <i>UAS-Dcr2 UAS-cd8GFP</i> +          | 8  |
|        | c | <i>ey</i> <sup>3.5</sup> - <i>Gal80</i> / <i>w</i> <sup>1118</sup> or Y; <i>fas3</i> <sup>NP1233</sup> - <i>Gal4</i> /+; <i>UAS-Dcr2 UAS-cd8GFP</i> +                      | 7  |
|        | d | <i>ey</i> <sup>3.5</sup> - <i>Gal80</i> /+ or Y; <i>fas3</i> <sup>NP1233</sup> - <i>Gal4</i> / <i>UAS-D</i> <sup>IR KK107194</sup> ; <i>UAS-Dcr2 UAS-cd8GFP</i> +          | 6  |
|        | e | <i>ey</i> <sup>3.5</sup> - <i>Gal80</i> / <i>w</i> <sup>1118</sup> or Y; <i>fas3</i> <sup>NP1233</sup> - <i>Gal4</i> /+; <i>UAS-Dcr2 UAS-cd8GFP</i> +                      | 3  |
|        | f | <i>ey</i> <sup>3.5</sup> - <i>Gal80</i> /+ or Y; <i>fas3</i> <sup>NP1233</sup> - <i>Gal4</i> / <i>UAS-D</i> <sup>IR KK107194</sup> ; <i>UAS-Dcr2 UAS-cd8GFP</i> +          | 8  |
|        | g | <i>ey</i> <sup>3.5</sup> - <i>Gal80</i> / <i>w</i> <sup>1118</sup> or Y; <i>fas3</i> <sup>NP1233</sup> - <i>Gal4</i> /+; <i>UAS-Dcr2 UAS-cd8GFP</i> +                      | 3  |
|        | h | <i>ey</i> <sup>3.5</sup> - <i>Gal80</i> /+ or Y; <i>fas3</i> <sup>NP1233</sup> - <i>Gal4</i> / <i>UAS-D</i> <sup>IR KK107194</sup> ; <i>UAS-Dcr2 UAS-cd8GFP</i> +          | 7  |
|        | i | +/ <i>w</i> <sup>1118</sup> or Y; <i>neur</i> <sup>P72</sup> - <i>Gal4 UAS-ponGFP</i> +                                                                                    | 6  |
|        | j | +/ <i>w</i> <sup>1118</sup> or Y; <i>UAS-tll</i> <sup>IR GD6236</sup> /+; <i>neur</i> <sup>P72</sup> - <i>Gal4 UAS-ponGFP</i> / <i>UAS-Dcr2</i>                            | 11 |
|        | k | +/ <i>w</i> <sup>1118</sup> or Y; <i>neur</i> <sup>P72</sup> - <i>Gal4 UAS-ponGFP</i> +                                                                                    | 7  |
|        | l | +/ <i>w</i> <sup>1118</sup> or Y; <i>UAS-tll</i> <sup>IR GD6236</sup> /+; <i>neur</i> <sup>P72</sup> - <i>Gal4 UAS-ponGFP</i> / <i>UAS-Dcr2</i>                            | 9  |
|        | m | +/ <i>w</i> <sup>1118</sup> or Y; <i>neur</i> <sup>P72</sup> - <i>Gal4 UAS-ponGFP</i> +                                                                                    | 8  |
|        | n | +/ <i>w</i> <sup>1118</sup> or Y; <i>UAS-tll</i> <sup>IR GD6236</sup> /+; <i>neur</i> <sup>P72</sup> - <i>Gal4 UAS-ponGFP</i> / <i>UAS-Dcr2</i>                            | 12 |
|        | o | <i>w</i> <sup>1118</sup>                                                                                                                                                   | 7  |
|        | p | <i>ato</i> <sup>1</sup>                                                                                                                                                    | 7  |
|        | q | <i>ey</i> <sup>3.5</sup> - <i>Gal80</i> /+ or Y; <i>ubi-GFP cycE</i> <sup>AR95</sup> <i>FRT40A</i> / <i>dac</i> <sup>1</sup> <i>FRT40A</i> ; <i>lama-Gal4 UAS-FLP mδ</i> + | 8  |

<sup>a</sup> If not otherwise indicated, in loss-of-function and knockdown experiments, all examined control samples were normal, while all experimental samples showed defects (100% penetrance).

## Supplementary Table 2

Full genotypes and numbers of samples shown in Supplementary figure panels.

| Figure | Panel  | Genotype                                                                                                                                                                                               | n = <sup>a</sup>                                                                                                                                                   |    |
|--------|--------|--------------------------------------------------------------------------------------------------------------------------------------------------------------------------------------------------------|--------------------------------------------------------------------------------------------------------------------------------------------------------------------|----|
| Suppl. | a      | <i>esg</i> <sup>MH766</sup> - <i>Gal4</i> / <i>esg-lacZ</i> <sup>B7-2-22</sup> ; <i>UAS-cd8GFP</i> /TM2                                                                                                | 7                                                                                                                                                                  |    |
| Fig. 1 | b      | <i>ey</i> <sup>3.5</sup> - <i>Gal80</i> / <i>w</i> <sup>1118</sup> or Y; <i>fas3</i> <sup>NP1233</sup> - <i>Gal4</i> /+; <i>UAS-Dcr2 UAS-cd8GFP</i> /+                                                 | 16                                                                                                                                                                 |    |
|        | c      | <i>ey</i> <sup>3.5</sup> - <i>Gal80</i> /+ or Y; <i>fas3</i> <sup>NP1233</sup> - <i>Gal4</i> / <i>UAS-fas3</i> <sup>IR KK100642</sup> ; <i>UAS-Dcr2 UAS-cd8GFP</i> /+                                  | 5                                                                                                                                                                  |    |
|        | d      | <i>w</i> <sup>1118</sup>                                                                                                                                                                               | 4                                                                                                                                                                  |    |
|        | Suppl. | a                                                                                                                                                                                                      | <i>ey</i> <sup>3.5</sup> - <i>Gal80</i> / <i>w</i> <sup>1118</sup> or Y; <i>fas3</i> <sup>NP1233</sup> - <i>Gal4</i> /+; <i>UAS-Dcr2 UAS-cd8GFP</i> /+             | 10 |
| Fig. 2 | b      | <i>ey</i> <sup>3.5</sup> - <i>Gal80</i> /+ or Y; <i>fas3</i> <sup>NP1233</sup> - <i>Gal4</i> /+; <i>UAS-Dcr2 UAS-cd8GFP</i> / <i>UAS-l'sc</i> <sup>IR JF02399</sup>                                    | 6                                                                                                                                                                  |    |
|        | c      | <i>ey</i> <sup>3.5</sup> - <i>Gal80</i> /+ or Y; <i>fas3</i> <sup>NP1233</sup> - <i>Gal4</i> / <i>UAS-l'sc</i> <sup>IR KK104691</sup> ; <i>UAS-Dcr2 UAS-cd8GFP</i> /+                                  | 4                                                                                                                                                                  |    |
|        | d      | <i>ey</i> <sup>3.5</sup> - <i>Gal80</i> /+ or Y; <i>fas3</i> <sup>NP1233</sup> - <i>Gal4</i> / <i>UAS-l'sc</i> <sup>IR KK104691</sup> ; <i>UAS-Dcr2 UAS-cd8GFP</i> /+                                  | 9                                                                                                                                                                  |    |
|        | e      | <i>ey</i> <sup>3.5</sup> - <i>Gal80</i> /+ or Y; <i>fas3</i> <sup>NP1233</sup> - <i>Gal4</i> / <i>UAS-l'sc</i> <sup>IR KK104691</sup> ; <i>UAS-Dcr2 UAS-cd8GFP</i> /+                                  | 7                                                                                                                                                                  |    |
|        | f      | <i>ey</i> <sup>3.5</sup> - <i>Gal80</i> /+ or Y; <i>fas3</i> <sup>NP1233</sup> - <i>Gal4</i> / <i>UAS-l'sc</i> <sup>IR KK104691</sup> ; <i>UAS-Dcr2 UAS-cd8GFP</i> /+                                  | 6                                                                                                                                                                  |    |
|        | g      | <i>ey</i> <sup>3.5</sup> - <i>Gal80</i> /+ or Y; <i>fas3</i> <sup>NP1233</sup> - <i>Gal4</i> / <i>UAS-l'sc</i> <sup>IR KK104691</sup> ; <i>UAS-Dcr2 UAS-cd8GFP</i> /+                                  | 5                                                                                                                                                                  |    |
|        | h      | <i>ey</i> <sup>3.5</sup> - <i>Gal80</i> /+ or Y; <i>fas3</i> <sup>NP1233</sup> - <i>Gal4</i> / <i>esg-lacZ</i> <sup>B7-2-22</sup> ; <i>UAS-Dcr2 UAS-cd8GFP</i> / <i>UAS-l'sc</i> <sup>IR JF02399</sup> | 14                                                                                                                                                                 |    |
|        | i      | <i>ey</i> <sup>3.5</sup> - <i>Gal80</i> /+ or Y; <i>fas3</i> <sup>NP1233</sup> - <i>Gal4</i> / <i>esg-lacZ</i> <sup>B7-2-22</sup> ; <i>UAS-Dcr2 UAS-cd8GFP</i> / <i>UAS-l'sc</i> <sup>IR JF02399</sup> | 7                                                                                                                                                                  |    |
|        | j      | <i>ey</i> <sup>3.5</sup> - <i>Gal80</i> /+ or Y; <i>fas3</i> <sup>NP1233</sup> - <i>Gal4</i> /+; <i>UAS-Dcr2 UAS-cd8GFP</i> / <i>UAS-l'sc</i> <sup>IR JF02399</sup>                                    | 4                                                                                                                                                                  |    |
|        | k      | <i>ey</i> <sup>3.5</sup> - <i>Gal80</i> /+ or Y; <i>fas3</i> <sup>NP1233</sup> - <i>Gal4</i> /+; <i>UAS-Dcr2 UAS-cd8GFP</i> / <i>UAS-l'sc</i> <sup>IR JF02399</sup>                                    | 6                                                                                                                                                                  |    |
|        | Suppl. | a                                                                                                                                                                                                      | <i>ey</i> <sup>3.5</sup> - <i>Gal80</i> / <i>w</i> <sup>1118</sup> or Y; <i>fas3</i> <sup>NP1233</sup> - <i>Gal4</i> /+; <i>UAS-Dcr2 UAS-cd8GFP</i> /+             | 10 |
| Fig. 3 |        | b                                                                                                                                                                                                      | <i>ey</i> <sup>3.5</sup> - <i>Gal80</i> /+ or Y; <i>fas3</i> <sup>NP1233</sup> - <i>Gal4</i> / <i>UAS-D</i> <sup>IR KK107194</sup> ; <i>UAS-Dcr2 UAS-cd8GFP</i> /+ | 3  |
|        |        | c                                                                                                                                                                                                      | <i>ey</i> <sup>3.5</sup> - <i>Gal80</i> /+ or Y; <i>fas3</i> <sup>NP1233</sup> - <i>Gal4</i> /+; <i>UAS-Dcr2 UAS-cd8GFP</i> / <i>UAS-D</i> <sup>IR GD49549</sup>   | 3  |
|        |        | d                                                                                                                                                                                                      | <i>ey</i> <sup>3.5</sup> - <i>Gal80</i> / <i>w</i> <sup>1118</sup> or Y; <i>fas3</i> <sup>NP1233</sup> - <i>Gal4</i> /+; <i>UAS-Dcr2 UAS-cd8GFP</i> /+             | 3  |
|        |        | e                                                                                                                                                                                                      | <i>ey</i> <sup>3.5</sup> - <i>Gal80</i> /+ or Y; <i>fas3</i> <sup>NP1233</sup> - <i>Gal4</i> / <i>UAS-D</i> <sup>IR KK107194</sup> ; <i>UAS-Dcr2 UAS-cd8GFP</i> /+ | 5  |
|        |        | f                                                                                                                                                                                                      | <i>ey</i> <sup>3.5</sup> - <i>Gal80</i> /+ or Y; <i>fas3</i> <sup>NP1233</sup> - <i>Gal4</i> /+; <i>UAS-Dcr2 UAS-cd8GFP</i> / <i>UAS-D</i> <sup>IR GD49549</sup>   | 6  |
|        | Suppl. | a                                                                                                                                                                                                      | <i>ey</i> <sup>3.5</sup> - <i>Gal80</i> / <i>w</i> <sup>1118</sup> or Y; <i>fas3</i> <sup>NP1233</sup> - <i>Gal4</i> /+; <i>UAS-Dcr2 UAS-cd8GFP</i> /+             | 5  |
| Fig. 4 |        | b                                                                                                                                                                                                      | <i>ey</i> <sup>3.5</sup> - <i>Gal80</i> /+ or Y; <i>fas3</i> <sup>NP1233</sup> - <i>Gal4</i> / <i>UAS-tll</i> <sup>IR GD6236</sup> ; <i>UAS-Dcr2 UAS-cd8GFP</i> /+ | 4  |
|        |        | c                                                                                                                                                                                                      | +/ <i>w</i> <sup>1118</sup> or Y; <i>neur</i> <sup>P72</sup> - <i>Gal4 UAS-ponGFP</i> /+                                                                           | 5  |
|        |        | d                                                                                                                                                                                                      | +/ <i>w</i> <sup>1118</sup> or Y; <i>UAS-tll</i> <sup>IR GD6236</sup> /+; <i>neur</i> <sup>P72</sup> - <i>Gal4 UAS-ponGFP</i> / <i>UAS-Dcr2</i>                    | 4  |

<sup>a</sup> If not otherwise indicated, in loss-of-function and knockdown experiments, all examined control samples were normal, while all experimental samples showed defects (100% penetrance).
